# Supplementary material
Source: PubMed Central journal article supplement (PMC4170005)
Supplement: NIHMS625064-supplement-01.pdf [file NIHMS625064-supplement-01.pdf]

**Supplemental Table 1.** Hazard ratios (HR) for diabetes specific variables modeled in the joint HNR/MESA data predicting hard CHD events (n=85) among 1343 participants followed for an average of 8.6 years

|                                        | <b>HR Adjusted for age and sex<br/>(95% CI; p-value)</b> | <b>HR Adjusted for<br/>Framingham Risk Score<br/>(95% CI;<br/>p-value)</b> |
|----------------------------------------|----------------------------------------------------------|----------------------------------------------------------------------------|
| 1) Duration of Diabetes<br>(per year)  | 1.04 (1.02 to 1.05; <.0001)                              | 1.02 (1.01 to 1.05; 0.0020)                                                |
| 2) Insulin Use                         | 2.20 (1.30 to 3.72; 0.0032)                              | 1.94 (1.14 to 3.29; 0.0150)                                                |
| 3) Multiple Med model:<br>Insulin      | 2.17 (1.25 to 3.74; 0.0056)                              | 1.91 (1.11 to 3.31; 0.0195)                                                |
| 3) Multiple Med model:<br>Metformin    | 0.92 (0.64 to 1.71; 0.73)                                | 0.84 (0.52 to 1.37; 0.48)                                                  |
| 3) Multiple Med model:<br>Sulfonylurea | 1.05 (0.64 to 1.71; 0.84)                                | 0.97 (0.59 to 1.59; 0.91)                                                  |
| 3) Multiple Med model:<br>Glitazone    | 1.28 (0.64 to 2.55; 0.49)                                | 1.15 (0.57 to 2.32; 0.69)                                                  |
| 4) HbA1c (per %)                       | 0.99 (0.86 to 1.15; 0.92)                                | 0.92 (0.80 to 1.08; 0.32)                                                  |
| 5) Baseline Glucose (per<br>mg/dL)     | 1.00 (1.00 to 1.01; 0.86)                                | 1.00 (0.99 to 1.00; 0.48)                                                  |

HbA1c: hemoglobin A1C

**Supplemental Table 2.** Bayesian Model Averaging to select posterior probability of including a traditional, diabetes-specific or novel risk factor in the family of possible models for the time to hard CHD in the HNR/MESA cohort.

| <b>Risk Factor</b>                   | <b>Posterior probability of selection</b> |
|--------------------------------------|-------------------------------------------|
| Age                                  | <b>48.6%</b>                              |
| Sex                                  | <b>37.6%</b>                              |
| Systolic Blood Pressure              | <b>21.3%</b>                              |
| Diastolic Blood Pressure             | 9.5%                                      |
| HDL Cholesterol                      | 5.0%                                      |
| LDL Cholesterol                      | 14.4%                                     |
| Total Cholesterol                    | 7.1%                                      |
| Triglycerides                        | 1.9%                                      |
| Current Smoking                      | 1.6%                                      |
| Anti-hypertension Medication use     | 2.1%                                      |
| Lipid Lowering Medication use        | 1.9%                                      |
| Log (CAC + 25)                       | <b>100%</b>                               |
| C-Reactive Protein (mg/L)            | 14.8%                                     |
| Ankle-Brachial index < 0.90          | 3.0%                                      |
| CCA intimal medial thickness (mm)    | 8.4%                                      |
| Pack-years of smoking (years)        | 2.2%                                      |
| Family History                       | 1.7%                                      |
| Unknown Family History               | 2.0%                                      |
| HbA1c (%)                            | 2.9%                                      |
| Baseline Glucose (mg/dL)             | 1.9%                                      |
| Metformin use                        | 4.6%                                      |
| Sulfonylurea use                     | 1.7%                                      |
| Insulin use                          | 3.6%                                      |
| Glitazone use                        | 1.7%                                      |
| Duration of Diabetes (years)         | <b>90.6%</b>                              |
| In MESA cohort (as a check variable) | 2.6%                                      |

CAC: coronary artery calcium score; CCA: common carotid artery; HbA1c: hemoglobin A1c

**Supplement Table 3.** Parameter estimate values for the components of the MESA- HNR 8 – year CHD risk score.

| Parameter                                                         | Estimate | 95% Confidence Interval |
|-------------------------------------------------------------------|----------|-------------------------|
| Hazard ratio for an increase in 1 unit of log(cac + 25)           | 1.60     | (1.36, 1.87)            |
| Hazard ratio for an increase of 5 years in duration of diabetes   | 1.14     | (1.04, 1.24)            |
| Hazard ratio for an increase of 5 years in age                    | 1.15     | (1.00, 1.32)            |
| Hazard ratio for male sex                                         | 1.64     | (0.99, 2.71)            |
| Hazard ratio for an increase of 5 mmHg of systolic blood pressure | 1.04     | (0.99, 1.08)            |
| Baseline survival at 8 years                                      | 0.94     | -                       |

CAC: coronary artery calcium score

**Supplement Table 4.** Model B predicted 8 year risks of hard coronary heart disease.

| Default states are 63 years old, male, sbp of 136, duration of diabetes of 5.5 years, and CAC of 74 agatston units. (This represents the mean patient.) |                                         |                       |
|---------------------------------------------------------------------------------------------------------------------------------------------------------|-----------------------------------------|-----------------------|
|                                                                                                                                                         | For (only changes from default listed): | 8 year estimated risk |
| 10 year age difference                                                                                                                                  | 58 years old                            | 6.7%                  |
|                                                                                                                                                         | 68 years old                            | 8.8%                  |
| Male vs. Female                                                                                                                                         | Male                                    | 7.7%                  |
|                                                                                                                                                         | Female                                  | 4.8%                  |
| SBP 25th to 75th percentile                                                                                                                             | 120 sbp                                 | 6.9%                  |
|                                                                                                                                                         | 150 sbp                                 | 8.4%                  |
| Duration of diabetes 25th to 75th percentile                                                                                                            | 0 years duration of diabetes            | 6.7%                  |
|                                                                                                                                                         | 8 years duration of diabetes            | 8.2%                  |
| CAC                                                                                                                                                     | 0                                       | 4.1%                  |
|                                                                                                                                                         | 10                                      | 4.8%                  |
|                                                                                                                                                         | 100                                     | 8.5%                  |
|                                                                                                                                                         | 400                                     | 14.6%                 |
|                                                                                                                                                         | 1000                                    | 21.2%                 |

SBP: systolic blood pressure, CAC: coronary artery calcium score

**Supplemental Table 5.**

Net Reclassification Improvement (NRI) table comparing the MESA-HNR score versus the New Pooled Equations (ASCVD risk estimator) for atherosclerotic cardiovascular disease (ASCVD) events.

| Risk in MESA-HNR Score |       |       |         |                             |                            |
|------------------------|-------|-------|---------|-----------------------------|----------------------------|
| Risk in ASCVD          | <7.5% | ≥7.5% | Overall | Reclassified as Higher Risk | Reclassified as Lower Risk |
| <b>&lt;7.5%</b>        |       |       |         |                             |                            |
| No. of participants    | 240   | 17    | 257     |                             |                            |
| No. of events          | 10    | 2     | 12      | 2                           | NA                         |
| No. of non-events      | 230   | 15    | 245     | 15                          | NA                         |
| <b>≥7.5%</b>           |       |       |         |                             |                            |
| No. of participants    | 744   | 342   | 1086    |                             |                            |
| No. of events          | 48    | 69    | 117     | NA                          | 48                         |
| No. of non-events      | 696   | 273   | 969     | NA                          | 696                        |
| <b>Overall</b>         |       |       |         |                             |                            |
| No. of participants    | 984   | 359   | 1343    |                             |                            |
| No. of events          | 58    | 71    | 129     | 2                           | 48                         |
| No. of non-events      | 926   | 288   | 1214    | 15                          | 696                        |

| n    | NRI*  | Standard Error NRI | P-value NRI |
|------|-------|--------------------|-------------|
| 1343 | 0.204 | 0.059              | <0.001      |

\*NRI= Net Reclassification Index

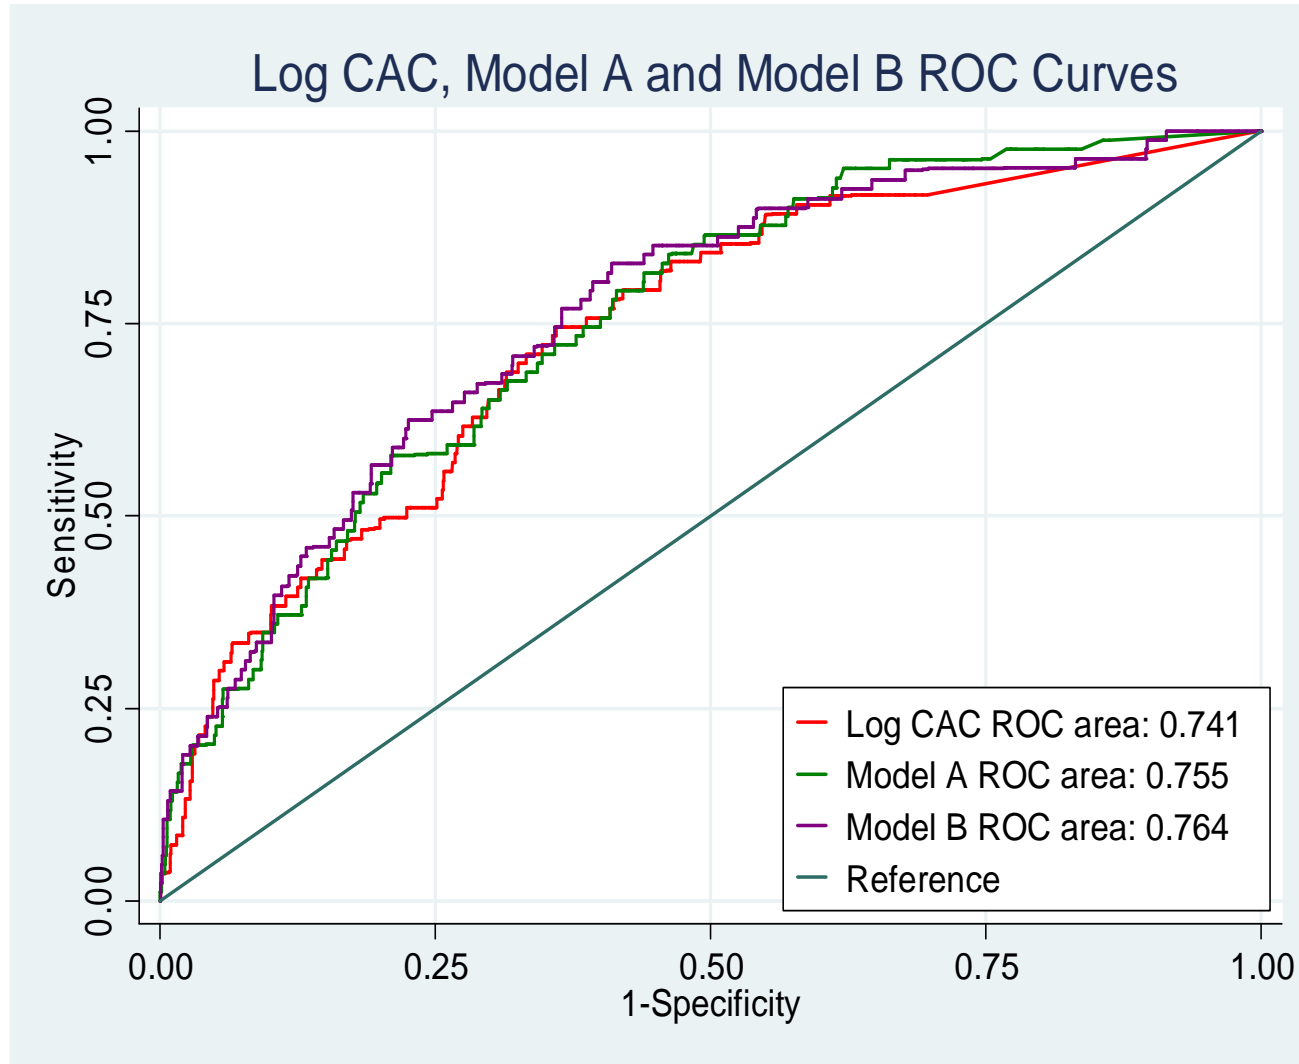

Supplement Figure 1: ROC curves comparing the discriminative ability( AUC) of Log(CAC + 25), model A[ log (CAC + 25) and duration of diabetes] and model B[ age, sex, systolic bp, duration of diabetes and log( CAC +25) ] for incident hard CHD in this cohort
